# Supplementary material
Source: PubMed Central journal article supplement (PMC7445432)
Supplement: mmc1.pdf [file mmc1.pdf]

## **Supplemental Information**

### **Longitudinal Isolation of Potent Near-Germline**

### **SARS-CoV-2-Neutralizing Antibodies**

### **from COVID-19 Patients**

**Christoph Kreer, Matthias Zehner, Timm Weber, Meryem S. Ercanoglu, Lutz Gieselmann, Cornelius Rohde, Sandro Halwe, Michael Korenkov, Philipp Schommers, Kanika Vanshylla, Veronica Di Cristanziano, Hanna Janicki, Reinhild Brinker, Artem Ashurov, Verena Krähling, Alexandra Kupke, Hadas Cohen-Dvashi, Manuel Koch, Jan Mathis Eckert, Simone Lederer, Nico Pfeifer, Timo Wolf, Maria J.G.T. Vehreschild, Clemens Wendtner, Ron Diskin, Henning Gruell, Stephan Becker, and Florian Klein**

**Table S1: Clinical data of SARS-CoV-2-infected study patients, related to Figure 1 and Figure 2**

| Patient ID    | Sex | Age | Symptoms                                                          | Radiological findings                                        | Detection of viral RNA  | Days from onset of symptoms to diagnosis | Days from diagnosis to blood draw 1 | Days from diagnosis to blood draw 2 | Days from diagnosis to blood draw 3 | Days from diagnosis to last negative PCR |
|---------------|-----|-----|-------------------------------------------------------------------|--------------------------------------------------------------|-------------------------|------------------------------------------|-------------------------------------|-------------------------------------|-------------------------------------|------------------------------------------|
| IDCnC2        | M   | 54  | dry cough, fever, arthralgia, hyposmia                            | N/A                                                          | NP swabs                | 3                                        | 17                                  | N/A                                 | N/A                                 | 23                                       |
| IDFnC2        | M   | 59  | asymptomatic                                                      | no findings                                                  | NP swabs, stool         | No Symptoms                              | 8                                   | N/A                                 | N/A                                 | 9                                        |
| IDHbnC1       | F   | 52  | dry cough, fever                                                  | N/A                                                          | NP swabs                | 2                                        | 35                                  | N/A                                 | N/A                                 | 19                                       |
| IDHbnC2       | F   | 44  | dry cough, fever, arthralgia, hyposmia                            | N/A                                                          | NP swabs                | 2                                        | 36                                  | N/A                                 | N/A                                 | 18                                       |
| IDHbnC3       | F   | 38  | asymptomatic                                                      | N/A                                                          | NP swabs                | N/A                                      | 35                                  | N/A                                 | N/A                                 | 17                                       |
| IDHbnC4       | F   | 50  | dry cough, fever, dyspnea                                         | N/A                                                          | NP swabs                | N/A                                      | 36                                  | N/A                                 | N/A                                 | 16                                       |
| IDHbnC5       | M   | 56  | dry cough, fever, dyspnea, hyposmia, ageusia, hepatitis, diarrhea | N/A                                                          | NP swabs                | 2                                        | 36                                  | N/A                                 | N/A                                 | 26                                       |
| IDFnC1        | F   | 45  | dry cough, rash, pharyngitis, otitis                              | no findings                                                  | NP swabs, stool         | 13                                       | 8                                   | 36                                  | 63                                  | 8                                        |
| IDMnC1 (#10)* | M   | 58  | dry cough, fever, hyposmia, ageusia                               | interstitial pneumonia of the left lower lobe                | NP swabs, sputum, stool | 2                                        | 9                                   | 16                                  | 36                                  | 26                                       |
| IDMnC2 (#3)*  | M   | 28  | dry cough, fever, sinusitis, dysosmia, ageusia, athralgia         | N/A                                                          | NP swabs, sputum, stool | 3                                        | 15                                  | 42                                  | 69                                  | 19                                       |
| IDMnC4 (#14)* | F   | 49  | dry cough, fever, diarrhea                                        | N/A                                                          | NP swabs, sputum, stool | 2                                        | 14                                  | 34                                  | 61                                  | 12                                       |
| IDMnC5 (#7)*  | M   | 52  | dry cough, fever, hyposmia, hypogeusia, dyspnea                   | bipulmonal, interstitial pneumonia, minimal pleural effusion | NP swabs, sputum, stool | 4                                        | 19                                  | 39                                  | 66                                  | 23                                       |

\*Clinical data partially taken from Wölfel R (2020) Virological assessment of hospitalized patients with COVID-2019. Nature; ID in brackets corresponds to ID in this reference.

M, F : male, female

N/A : not available

NP : nasopharyngeal

**Table S2: Poly-IgG of SARS-CoV-2-infected study patients, related to Figure 1 and 2**

| poly-IgG |            | Binding data <sup>1</sup>  |                   | Neutralization            |
|----------|------------|----------------------------|-------------------|---------------------------|
| Name     | Time point | SARS-CoV-2 (spike protein) |                   |                           |
|          |            | EC <sub>50</sub> (µg/mL)   | Commercial ELISA* | IC <sub>100</sub> (µg/mL) |
| IDCnC2   | 1          | 15,65                      | 0,75              | 187,50                    |
| IDFnC1   | 1          | 106,44                     | 0,16              | n.n.                      |
|          | 2          | 92,19                      | 0,27              | 1500,00                   |
|          | 3          | 100,81                     | 0,26              | 1500,00                   |
| IDFnC2   | 1          | 76,37                      | 0,17              | n.n.                      |
| IDHnC1   | 1          | 96,14                      | 0,27              | 1500,00                   |
| IDHnC2   | 1          | 58,05                      | 0,20              | 891,91                    |
| IDHnC3   | 1          | 14,82                      | 1,84              | 157,67                    |
| IDHnC4   | 1          | 61,14                      | <0,15             | n.n.                      |
| IDHnC5   | 1          | 3,10                       | 5,75              | 78,83                     |
| IDMnC1   | 1          | 129,18                     | <0,15             | n.n.                      |
|          | 2          | 61,94                      | 0,16              | n.n.                      |
|          | 3          | 41,74                      | 0,33              | 891,91                    |
| IDMnC2   | 1          | 41,47                      | 0,43              | 750,00                    |
|          | 2          | 36,56                      | 0,73              | 530,33                    |
|          | 3          | 45,60                      | 0,60              | 445,95                    |
| IDMnC3   | 1          | 47,48                      | 0,30              | 891,91                    |
| IDMnC4   | 1          | 5,97                       | 3,87              | 265,17                    |
|          | 2          | 8,29                       | 3,90              | 111,49                    |
|          | 3          | 10,83                      | 3,03              | 157,67                    |
| IDMnC5   | 1          | 1,54                       | 7,75              | 78,83                     |
|          | 2          | 2,04                       | 6,77              | 78,80                     |
|          | 3          | 4,10                       | 5,01              | 78,83                     |

1) Signal intensity of an OD ≥ 0.25 (not shown) and EC<sub>50</sub> below 30 µg/mL was defined as binding

\* Euroimmun IgG detection kit

n.n. not neutralizing (IC<sub>100</sub> > 1500 µg/mL)

N/A not available

**Table S3: B cell analysis summary, related to Figure 1, Figure 2, and Figure 3**

| Patient ID                 | % IgG+ B cells <sup>†</sup> | % bait positive <sup>†</sup> | Isolated B cells | Productive heavy chains | % clonal | Total clones | Median clone size | Largest clone size | Cloned mAbs | S-binding mAbs | Neutralizing mAbs |
|----------------------------|-----------------------------|------------------------------|------------------|-------------------------|----------|--------------|-------------------|--------------------|-------------|----------------|-------------------|
| IDCnC2                     | 10.63 ± 0.12                | 0.67 ± 0.16                  | 210              | 181                     | 34       | 23           | 2                 | 7                  | 51          | 15             | 6                 |
| IDFnC2                     | 10.42 ± 1.1                 | 0.04 ± 0.06                  | 176              | 119                     | 43       | 12           | 2                 | 29                 | 14          | 1              | 0                 |
| IDHbnC1                    | 6.74 ± 0.41                 | 0.23 ± 0.06                  | 311              | 280                     | 30       | 36           | 2                 | 7                  | 24          | 1              | 0                 |
| IDHbnC2                    | 11.87 ± 0.5                 | 0.21 ± 0.07                  | 213              | 178                     | 33       | 24           | 2                 | 7                  | 12          | 1              | 1                 |
| IDHbnC3                    | 5.98 ± 0.13                 | 1.02 ± 0.11                  | 372              | 324                     | 20       | 27           | 2                 | 10                 | 15          | 5              | 5                 |
| IDHbnC4                    | 9.46 ± 0.22                 | 0.25 ± 0.03                  | 223              | 144                     | 42       | 27           | 2                 | 13                 | 14          | 5              | 1                 |
| IDHbnC5                    | 15.83 ± 0.5                 | 0.22 ± 0.02                  | 246              | 208                     | 45       | 38           | 2                 | 6                  | 6           | 3              | 0                 |
| IDFnC1 <sup>‡</sup>        | 17.1 ± 0.82                 | 0.05 ± 0.03                  | 652              | 562                     | 47       | 95           | 2                 | 23                 | 39          | 6              | 3                 |
| IDMnC1 (#10) <sup>*‡</sup> | 6.06 ± 1.24                 | 0.27 ± 0.16                  | 245              | 199                     | 34       | 20           | 2                 | 22                 | 19          | 6              | 1                 |
| IDMnC2 (#3) <sup>*‡</sup>  | 10.75 ± 0.69                | 0.07 ± 0.07                  | 732              | 570                     | 22       | 49           | 2                 | 13                 | 30          | 10             | 3                 |
| IDMnC4 (#14) <sup>*‡</sup> | 7.12 ± 0.65                 | 0.52 ± 0.15                  | 348              | 297                     | 51       | 40           | 2                 | 18                 | 19          | 15             | 7                 |
| IDMnC5 (#7) <sup>*‡</sup>  | 7.32 ± 0.72                 | 0.44 ± 0.28                  | 585              | 513                     | 21       | 50           | 2                 | 5                  | 12          | 11             | 1                 |
| <b>mean</b>                | 9.94 ± 3.66                 | 0.33 ± 0.29                  | 359              | 298                     | 35       | 37           | 2                 | 13                 | 21          | 7              | 2                 |
| <b>sum</b>                 | -                           | -                            | 4313             | 3575                    | -        | 441          | -                 | -                  | 255         | 79             | 28                |

\* ID in brackets corresponds to IDs in Wölfel R (2020) Virological assessment of hospitalized patients with COVID-2019. Nature.

† % IgG+ and bait positive cells show mean ± SD over all sorted plates

‡ For longitudinal data % IgG and % bait positives are given as mean values and clonal analysis was performed over all time points. See to Figure 2 for time-resolved analyses.

**Table S4: Isolated SARS-CoV-2-interacting antibodies, related to Figure 3 and 4**

| Antibody      |         |                          |            |                                  |          |                                  | Binding data <sup>1</sup>  |                                  |                   |                  |                  | Epitope          |                  |                        | HEp2<br>autoreactivity | Neutralization<br>IC <sub>100</sub><br>(µg/mL) |
|---------------|---------|--------------------------|------------|----------------------------------|----------|----------------------------------|----------------------------|----------------------------------|-------------------|------------------|------------------|------------------|------------------|------------------------|------------------------|------------------------------------------------|
| Name          | Clone # | Number of clonal members | VH-gene    | VH-gene germline identity (% nt) | VL-gene  | VL-gene germline identity (% nt) | SARS-CoV-2 (spike protein) |                                  |                   | EBOVΔTM          | HIV gp140        | RBD <sup>3</sup> | S1 <sup>4</sup>  | Monomeric <sup>5</sup> |                        |                                                |
|               |         |                          |            |                                  |          |                                  | EC <sub>50</sub> (µg/mL)   | K <sub>D</sub> (nM) <sup>2</sup> | Commercial ELISA* | EC <sub>50</sub>       | EC <sub>50</sub>       |                                                |
| CnC2t1p1_A2   | C2_5    | 4                        | IGHV1-46   | 99.7                             | IGKV3-20 | 100                              | 0.03                       | N/A                              | 2.40              | -                | -                | +                | ++               | ++                     | N/A                    | n.n.                                           |
| CnC2t1p1_A6   | C2_17   | 2                        | IGHV3-30   | 99.3                             | IGKV3-11 | 100                              | 3.90                       | N/A                              | N/A               | -                | -                | -                | -                | ++                     | N/A                    | N/A                                            |
| CnC2t1p1_B10  | C2_8    | 2                        | IGHV1-69   | 100                              | IGKV3-11 | 100                              | 0.32                       | 8.10                             | N/A               | -                | -                | +++              | ++               | +                      | -                      | 12.50                                          |
| CnC2t1p1_B4   | C2_2    | 2                        | IGHV1-18   | 100                              | IGLV2-23 | 100                              | 0.03                       | 80                               | 7.57              | -                | -                | +++              | +++              | +++                    | -                      | 0.78                                           |
| CnC2t1p1_D6   | C2_23   | 2                        | IGHV3-49   | 100                              | IGKV2-28 | 99.7                             | 0.03                       | 37                               | 9.26              | -                | -                | +++              | +                | +++                    | -                      | 3.72                                           |
| CnC2t1p1_E11  | single  | -                        | IGHV3-30   | 100                              | IGLV2-14 | 99.3                             | 5.20                       | N/A                              | <0.15             | -                | -                | -                | -                | -                      | N/A                    | n.n.                                           |
| CnC2t1p1_E12  | C2_23   | 2                        | IGHV3-49   | 99.7                             | IGKV2-28 | 100                              | 0.03                       | 38                               | 9.03              | -                | -                | +++              | +++              | +++                    | -                      | 3.13                                           |
| CnC2t1p1_E7   | C2_5    | 4                        | IGHV1-46   | 100                              | IGKV3-20 | 99                               | 0.04                       | N/A                              | N/A               | -                | -                | -                | ++               | +                      | N/A                    | n.n.                                           |
| CnC2t1p1_E8   | C2_3    | 6                        | IGHV1-2    | 91.5                             | IGLV2-23 | 95.6                             | 0.13                       | 3.20                             | 6.88              | -                | -                | +++              | +                | +++                    | -                      | 4.42                                           |
| CnC2t1p1_F5   | single  | -                        | IGHV3-30   | 99                               | IGLV5-45 | 99.7                             | 0.05                       | N/A                              | N/A               | -                | -                | +                | +                | +                      | ++                     | N/A                                            |
| CnC2t1p1_G6   | C2_3    | 6                        | IGHV1-2    | 90.1                             | IGLV2-23 | 94.6                             | 0.31                       | 7.30                             | 4.72              | -                | -                | +++              | +                | ++                     | -                      | 12.50                                          |
| CnC2t1p2_E4   | C2_11   | 3                        | IGHV3-15   | 100                              | IGKV3-20 | 100                              | 0.26                       | N/A                              | <0.15             | -                | -                | -                | -                | -                      | N/A                    | n.n.                                           |
| CnC2t1p2_F12  | C2_10   | 2                        | IGHV3-15   | 100                              | IGKV3-20 | 100                              | 0.06                       | N/A                              | <0.15             | -                | -                | -                | -                | -                      | N/A                    | n.n.                                           |
| CnC2t1p2_F4   | C2_15   | 3                        | IGHV3-30   | 96.3                             | IGKV6-21 | 97.9                             | 3.04                       | N/A                              | <0.15             | -                | -                | -                | -                | -                      | N/A                    | n.n.                                           |
| CnC2t1p2_G4   | C2_11   | 3                        | IGHV3-15   | 100                              | IGKV3-20 | 100                              | 0.25                       | N/A                              | <0.15             | -                | -                | -                | +++              | -                      | N/A                    | n.n.                                           |
| FnC1t1p1_B6   | F1_77   | 11                       | IGHV3-53   | 93.8                             | IGLV2-8  | 98.6                             | 0.96                       | N/A                              | <0.15             | -                | -                | +++              | ++               | +                      | N/A                    | n.n.                                           |
| FnC1t1p1_C11  | F1_76   | 4                        | IGHV3-53   | 93.8                             | IGLV2-8  | 99.7                             | 2.91                       | N/A                              | <0.15             | +                | +                | +                | +                | +                      | -                      | n.n.                                           |
| FnC1t1p2_A5   | single  | -                        | IGHV1-8    | 100                              | IGKV3-20 | 100                              | 1.36                       | N/A                              | <0.15             | +                | ++               | -                | -                | -                      | ++                     | 16.00                                          |
| FnC1t2p1_A12  | F1_89   | 2                        | IGHV4-4    | 97.9                             | IGLV2-14 | 97.6                             | 2.81                       | N/A                              | <0.15             | +                | +                | -                | -                | +                      | +                      | n.n.                                           |
| FnC1t2p1_D4   | F1_95   | 2                        | IGHV7-4-1  | 96.6                             | IGKV1-33 | 99                               | 0.02                       | 0.20                             | 9.00              | -                | -                | +++              | +++              | +++                    | -                      | 0.28                                           |
| FnC1t2p1_G5   | F1_95   | 2                        | IGHV7-4-1  | 96.6                             | IGKV1-33 | 99                               | 0.02                       | 0.10                             | 9.00              | -                | -                | +++              | +++              | +++                    | -                      | 0.33                                           |
| FnC2t1p1_B1   | F2_12   | 3                        | IGHV4-34   | 92.2                             | IGLV1-44 | 92.7                             | 0.78                       | N/A                              | <0.15             | -                | -                | ++               | ++               | +                      | N/A                    | n.n.                                           |
| HbnC1t1p3_H8  | H1_6    | 2                        | IGHV3-21   | 100                              | IGKV1-5  | 99.6                             | 0.08                       | N/A                              | <0.15             | -                | -                | -                | +++              | +++                    | N/A                    | n.n.                                           |
| HbnC2t1p2_D9  | H2_20   | 2                        | IGHV3-33   | 98.6                             | IGKV3-11 | 99                               | 0.04                       | 72                               | N/A               | -                | -                | ++               | ++               | ++                     | -                      | 0.93                                           |
| HbnC3t1p1_C6  | H3_3    | 2                        | IGHV1-58   | 99.7                             | IGKV3-20 | 99.7                             | 0.06                       | 0.19                             | 9.00              | -                | -                | +++              | +++              | +++                    | -                      | 0.04                                           |
| HbnC3t1p1_F4  | H3_10   | 10                       | IGHV3-30   | 93.2                             | IGKV1-5  | 96.1                             | 0.04                       | 0.26                             | 8.78              | -                | -                | ++               | +++              | ++                     | +                      | 0.78                                           |
| HbnC3t1p1_G4  | single  | -                        | IGHV3-66   | 99.7                             | IGKV3-20 | 98.3                             | 0.02                       | 1.50                             | N/A               | -                | -                | +++              | +++              | +++                    | ++                     | 0.12                                           |
| HbnC3t1p2_B10 | single  | -                        | IGHV3-66   | 99                               | IGKV3-20 | 97.9                             | 0.22                       | 1.00                             | 9.00              | -                | -                | +++              | +++              | +++                    | -                      | 0.25                                           |
| HbnC3t1p2_C6  | H3_3    | 2                        | IGHV1-58   | 98.3                             | IGKV3-20 | 99.7                             | 0.04                       | 16                               | 10.00             | -                | -                | +++              | +++              | +++                    | -                      | 0.33                                           |
| HbnC4t1p1_A1  | H4_5    | 9                        | IGHV3-23   | 100                              | IGKV1-33 | 100                              | 0.12                       | N/A                              | 2.98              | -                | -                | +++              | +++              | +++                    | N/A                    | n.n.                                           |
| HbnC4t1p1_A6  | H4_23   | 2                        | IGHV3-30-3 | 98                               | IGKV4-1  | 98.4                             | 3.36                       | N/A                              | <0.15             | -                | -                | -                | -                | +                      | N/A                    | N/A                                            |
| HbnC4t1p1_C11 | H4_5    | 9                        | IGHV3-23   | 100                              | IGKV1-33 | 100                              | 0.25                       | N/A                              | 8.04              | -                | -                | +++              | +++              | +++                    | N/A                    | n.n.                                           |
| HbnC4t1p1_D5  | H4_27   | 4                        | IGHV3-9    | 99.7                             | IGKV1-39 | 98.2                             | 0.25                       | 153                              | <0.15             | ++               | +++              | ++               | ++               | +                      | -                      | 10.51                                          |
| HbnC4t1p1_G2  | single  | -                        | IGHV3-30   | 98.3                             | IGKV1-39 | 99.7                             | 0.09                       | N/A                              | <0.15             | -                | -                | -                | -                | +++                    | N/A                    | N/A                                            |
| HbnC5t1p1_B6  | H5_2    | 6                        | IGHV1-46   | 87.6                             | IGKV2-24 | 97.0                             | 0.07                       | N/A                              | 9.86              | -                | -                | -                | +++              | +++                    | N/A                    | N/A                                            |
| HbnC5t1p1_C11 | H5_4    | 2                        | IGHV1-46   | 93.9                             | IGKV2-24 | 96.4                             | 0.46                       | N/A                              | N/A               | -                | -                | -                | -                | +                      | N/A                    | N/A                                            |
| HbnC5t1p1_D4  | H5_26   | 2                        | IGHV3-53   | 98.6                             | IGKV1-9  | 100                              | 0.04                       | N/A                              | <0.15             | -                | -                | -                | -                | +++                    | N/A                    | n.n.                                           |
| MnC1t2p1_A5   | M1_19   | 22                       | IGHV3-49   | 89.3                             | IGKV4-1  | 96.4                             | 0.03                       | N/A                              | <0.15             | -                | -                | +++              | -                | +++                    | N/A                    | N/A                                            |
| MnC1t2p1_B11  | M1_19   | 22                       | IGHV3-49   | 93.3                             | IGKV4-1  | 97.7                             | 0.03                       | N/A                              | <0.15             | -                | -                | -                | -                | +++                    | N/A                    | n.n.                                           |
| MnC1t3p1_B7   | M1_19   | 22                       | IGHV3-49   | 90.1                             | IGKV4-1  | 94.7                             | 0.04                       | N/A                              | N/A               | -                | -                | N/A              | N/A              | N/A                    | N/A                    | N/A                                            |

1) Signal intensity of an OD ≥0.25 (not shown) and EC<sub>50</sub> below 30 µg/mL was defined as binding

2) Interaction with the receptor-binding domain

3) Receptor-binding domain

4) Truncated S1 subunit

5) Interaction with a non-trimerized spike protein

\* Euroimmun IgG detection kit

+ EC<sub>50</sub> >1 µg/µl

++ 0.1 µg/µL < EC<sub>50</sub> ≤1 µg/µL

+++ EC<sub>50</sub> ≤0.1 µg/µL

n.n. not neutralizing (IC<sub>100</sub> >100 µg/mL)

nt. nucleotide

N/A not available

**Table S4 (continued): Isolated SARS-CoV-2-interacting antibodies, related to Figure 3 and Figure 4**

| Antibody     |         |                          |            |                                  |           |                                  | Binding data <sup>1</sup>  |                                  |                   |                  |                  | Epitope          |                  |                        | HEp2<br>autoreactivity | Neutralization<br>IC <sub>100</sub><br>(µg/mL) |
|--------------|---------|--------------------------|------------|----------------------------------|-----------|----------------------------------|----------------------------|----------------------------------|-------------------|------------------|------------------|------------------|------------------|------------------------|------------------------|------------------------------------------------|
| Name         | Clone # | Number of clonal members | VH-gene    | VH-gene germline identity (% nt) | VL-gene   | VL-gene germline identity (% nt) | SARS-CoV-2 (spike protein) |                                  |                   | EBOVΔTM          | HIV gp140        | RBD <sup>3</sup> | S1 <sup>4</sup>  | Monomeric <sup>5</sup> |                        |                                                |
|              |         |                          |            |                                  |           |                                  | EC <sub>50</sub> (µg/mL)   | K <sub>D</sub> (nM) <sup>2</sup> | Commercial ELISA* | EC <sub>50</sub>       |                        |                                                |
| MnC1t3p1_E3  | M1_19   | 22                       | IGHV3-49   | 93.9                             | IGKV4-1   | 98.7                             | 0.03                       | N/A                              | N/A               | -                | -                | -                | -                | +++                    | N/A                    | N/A                                            |
| MnC1t3p1_F3  | single  | -                        | IGHV3-30   | 97.3                             | IGLV2-23  | 98.3                             | 2.82                       | N/A                              | N/A               | +                | +                | -                | -                | +++                    | -                      | N/A                                            |
| MnC1t3p1_G9  | M1_2    | 3                        | IGHV3-23   | 94.5                             | IGLV7-46  | 97.6                             | 0.33                       | 34                               | 5.42              | -                | -                | +++              | +++              | +++                    | ++                     | 8.84                                           |
| MnC2t1p1_A12 | single  | -                        | IGHV1-2    | 99.7                             | IGLV2-14  | 99                               | 4.03                       | N/A                              | <0.15             | -                | +                | -                | -                | +                      | -                      | n.n.                                           |
| MnC2t1p1_A3  | M2_25   | 3                        | IGHV3-66   | 99                               | IGKV1D-12 | 100                              | 0.05                       | 0.70                             | 6.44              | -                | -                | +++              | +++              | +++                    | -                      | 0.78                                           |
| MnC2t1p1_C1  | single  | -                        | IGHV3-21   | 99.7                             | IGKV3-15  | 99                               | 0.18                       | N/A                              | <0.15             | ++               | -                | -                | ++               | +++                    | -                      | n.n.                                           |
| MnC2t1p1_C12 | single  | -                        | IGHV4-31   | 97.3                             | IGKV3-20  | 96.8                             | 0.02                       | N/A                              | <0.15             | -                | -                | -                | -                | +++                    | N/A                    | n.n.                                           |
| MnC2t1p1_C5  | M2_25   | 3                        | IGHV3-66   | 100                              | IGKV1D-12 | 100                              | 0.07                       | N/A                              | 5.85              | -                | -                | +++              | +++              | +++                    | -                      | 3.72                                           |
| MnC2t2p1_C11 | single  | -                        | IGHV1-69   | 98.6                             | IGKV1-39  | 98.9                             | 0.02                       | 0.02                             | 6.79              | -                | -                | +++              | +++              | +++                    | -                      | 0.25                                           |
| MnC2t2p1_D7  | M2_29   | 3                        | IGHV3-7    | 95.9                             | IGLV2-8   | 98.3                             | 1.41                       | N/A                              | <0.15             | +                | +                | -                | -                | -                      | N/A                    | n.n.                                           |
| MnC2t2p1_E1  | single  | -                        | IGHV4-61   | 98.3                             | IGKV1-9   | 98.6                             | 0.50                       | N/A                              | <0.15             | -                | -                | -                | -                | +                      | N/A                    | n.n.                                           |
| MnC2t2p1_E4  | M2_42   | 3                        | IGHV4-4    | 95.9                             | IGLV2-14  | 95.9                             | 0.70                       | N/A                              | <0.15             | -                | -                | -                | -                | ++                     | N/A                    | n.n.                                           |
| MnC2t2p1_G7  | M2_33   | 2                        | IGHV3-73   | 91.4                             | IGLV2-14  | 93.8                             | 4.48                       | N/A                              | <0.15             | +                | +                | -                | -                | -                      | -                      | n.n.                                           |
| MnC4t1p1_A10 | M4_27   | 18                       | IGHV4-39   | 94.6                             | IGKV1-17  | 96.8                             | 0.07                       | 520                              | 4.87              | -                | -                | +++              | +++              | +++                    | -                      | 42.04                                          |
| MnC4t1p1_A11 | M4_22   | 5                        | IGHV3-48   | 96.9                             | IGKV3-20  | 97.9                             | 0.05                       | 2000                             | 4.52              | -                | -                | +++              | +++              | +++                    | -                      | 100.00                                         |
| MnC4t1p1_A6  | M4_25   | 15                       | IGHV3-9    | 95.3                             | IGKV1-12  | 97.5                             | 0.07                       | N/A                              | 10.24             | -                | -                | +++              | +++              | +++                    | N/A                    | n.n.                                           |
| MnC4t1p1_A7  | M4_38   | 7                        | IGHV4-61   | 93.6                             | IGKV1-39  | 92.3                             | 2.81                       | N/A                              | <0.15             | -                | -                | -                | -                | -                      | N/A                    | N/A                                            |
| MnC4t2p1_A8  | M4_40   | 3                        | IGHV7-4-1  | 96.6                             | IGKV3-20  | 96.8                             | 1.60                       | N/A                              | 0.24              | -                | -                | +++              | ++               | ++                     | N/A                    | n.n.                                           |
| MnC4t2p1_B3  | M4_25   | 15                       | IGHV3-9    | 94.6                             | IGKV1-12  | 96.8                             | 0.06                       | 0.09                             | N/A               | -                | -                | +++              | +++              | +++                    | -                      | 0.66                                           |
| MnC4t2p1_C5  | M4_3    | 7                        | IGHV1-2    | 95.9                             | IGLV2-8   | 98.6                             | 0.79                       | N/A                              | <0.15             | ++               | ++               | +                | +                | +                      | -                      | n.n.                                           |
| MnC4t2p1_D1  | single  | -                        | IGHV1-69   | 99                               | IGKV1-5   | 98.9                             | 3.86                       | N/A                              | <0.15             | +                | +                | -                | -                | ++                     | -                      | n.n.                                           |
| MnC4t2p1_D10 | M4_27   | 18                       | IGHV4-39   | 94.6                             | IGKV1-17  | 96.8                             | 0.18                       | 440                              | 5.30              | -                | -                | +++              | +++              | +++                    | -                      | 21.02                                          |
| MnC4t2p1_E6  | M4_25   | 15                       | IGHV3-9    | 95.3                             | IGKV1-12  | 97.5                             | 0.03                       | 40                               | 8.08              | -                | -                | +++              | +++              | +++                    | -                      | 50.00                                          |
| MnC4t2p1_F5  | M4_27   | 18                       | IGHV4-39   | 94.6                             | IGKV1-17  | 96.8                             | 0.07                       | 89                               | 5.19              | -                | -                | +++              | +++              | +++                    | -                      | 100.00                                         |
| MnC4t2p1_F8  | M4_25   | 15                       | IGHV3-9    | 95.3                             | IGKV1-12  | 97.5                             | 0.03                       | N/A                              | 10.08             | -                | -                | +++              | +++              | +++                    | N/A                    | n.n.                                           |
| MnC4t2p1_G3  | M4_40   | 3                        | IGHV7-4-1  | 95.2                             | IGKV3-20  | 95.8                             | 0.03                       | N/A                              | 7.60              | -                | -                | +++              | +++              | +++                    | N/A                    | n.n.                                           |
| MnC4t2p2_A4  | M4_39   | 5                        | IGHV7-4-1  | 96.6                             | IGKV3-20  | 95.8                             | 0.02                       | 14                               | 10.17             | -                | -                | +++              | +++              | +++                    | -                      | 21.02                                          |
| MnC4t2p2_A7  | M4_35   | 2                        | IGHV4-59   | 95.6                             | IGKV4-1   | 98.0                             | 0.11                       | N/A                              | <0.15             | -                | -                | -                | -                | ++                     | N/A                    | N/A                                            |
| MnC5t1p1_C12 | single  | -                        | IGHV3-30   | 99.3                             | IGKV1-9   | 99.7                             | 1.40                       | N/A                              | <0.15             | -                | -                | -                | -                | +++                    | N/A                    | n.n.                                           |
| MnC5t1p1_C4  | M5_30   | 2                        | IGHV3-30-3 | 99.3                             | IGKV3-20  | 99.3                             | 1.31                       | N/A                              | <0.15             | -                | -                | -                | -                | +++                    | N/A                    | n.n.                                           |
| MnC5t1p1_C6  | single  | -                        | IGHV3-30-3 | 99.7                             | IGKV3-20  | 100                              | 4.23                       | N/A                              | <0.15             | +                | -                | -                | -                | ++                     | -                      | n.n.                                           |
| MnC5t1p1_C7  | single  | -                        | IGHV3-30-3 | 99                               | IGKV1-5   | 99.6                             | 4.62                       | N/A                              | <0.15             | -                | -                | -                | -                | -                      | N/A                    | n.n.                                           |
| MnC5t2p1_B5  | single  | -                        | IGHV3-30-3 | 97.6                             | IGKV3-20  | 99.3                             | 3.69                       | N/A                              | <0.15             | -                | -                | -                | -                | +++                    | N/A                    | n.n.                                           |
| MnC5t2p1_C2  | single  | -                        | IGHV3-30-3 | 100                              | IGLV4-69  | 100                              | 4.17                       | N/A                              | <0.15             | -                | -                | -                | -                | -                      | N/A                    | n.n.                                           |
| MnC5t2p1_C5  | single  | -                        | IGHV3-30-3 | 100                              | IGKV4-1   | 100                              | 3.76                       | N/A                              | <0.15             | -                | -                | -                | -                | ++                     | N/A                    | n.n.                                           |
| MnC5t2p1_E12 | single  | -                        | IGHV3-30-3 | 97.6                             | IGKV6-21  | 99.3                             | 3.87                       | N/A                              | <0.15             | -                | -                | -                | -                | +++                    | N/A                    | n.n.                                           |
| MnC5t2p1_E9  | M5_1    | 4                        | IGHV1-18   | 85.3                             | IGKV3-15  | 97.6                             | 3.01                       | N/A                              | <0.15             | +                | -                | -                | -                | ++                     | -                      | n.n.                                           |
| MnC5t2p1_G1  | M5_4    | 2                        | IGHV1-58   | 98.6                             | IGKV3-20  | 99                               | 0.03                       | 17                               | 10.48             | -                | -                | +++              | +++              | +++                    | -                      | 2.63                                           |
| MnC5t2p1_G6  | M5_1    | 4                        | IGHV1-18   | 87.7                             | IGKV3-15  | 96.2                             | 3.71                       | N/A                              | <0.15             | -                | -                | -                | -                | ++                     | N/A                    | n.n.                                           |

1) Signal intensity of an OD ≥0.25 (not shown) and EC<sub>50</sub> below 30 µg/mL was defined as binding

2) Interaction with the receptor-binding domain

3) Receptor-binding domain

4) TruncatedS1 subunit

5) Interaction with a non-trimerized spike protein

\* Euroimmun IgG detection kit

+ EC<sub>50</sub> >1 µg/µl

++ 0.1 µg/µL < EC<sub>50</sub> ≤1 µg/µL

+++ EC<sub>50</sub> ≤0.1 µg/µL

n.n. not neutralizing (IC<sub>100</sub> >100 µg/mL)

nt. nucleotide

N/A not available

**Table S5: Healthy individuals, related to Figure 2 and Figure 5**

| <b>Patient ID</b> | <b>Sex</b> | <b>Age</b> | <b>Date of blood draw</b> |
|-------------------|------------|------------|---------------------------|
| 75                | F          | 47         | 27.12.16                  |
| 76                | F          | 51         | 27.12.16                  |
| 84                | M          | 47         | 28.12.16                  |
| 85                | M          | 23         | 28.12.16                  |
| 86                | M          | 47         | 28.12.16                  |
| 90                | F          | 25         | 02.01.17                  |
| 91                | M          | 55         | 02.01.17                  |
| 92                | F          | 54         | 02.01.17                  |
| 93                | M          | 34         | 02.01.17                  |
| 94                | M          | 31         | 02.01.17                  |
| 95                | M          | 19         | 03.01.17                  |
| 96                | M          | 55         | 03.01.17                  |
| 97                | F          | 22         | 03.01.17                  |
| 98                | M          | 34         | 03.01.17                  |
| 99                | M          | 51         | 03.01.17                  |
| 100               | M          | 46         | 03.01.17                  |
| 101               | M          | 46         | 04.01.17                  |
| 102               | M          | 31         | 04.01.17                  |
| 103               | M          | 25         | 04.01.17                  |
| 104               | M          | 21         | 04.01.17                  |
| 105               | M          | 20         | 04.01.17                  |
| 106               | F          | 48         | 04.01.17                  |
| 117               | F          | 24         | 10.01.17                  |
| 118               | M          | 30         | 10.01.17                  |
| 119               | F          | 28         | 10.01.17                  |
| 120               | M          | 21         | 10.01.17                  |
| 121               | F          | 21         | 10.01.17                  |
| 126               | F          | 24         | 11.01.17                  |
| 127               | M          | 42         | 11.01.17                  |
| 128               | F          | 67         | 11.01.17                  |
| 130               | M          | 37         | 12.01.17                  |
| 131               | F          | 67         | 12.01.17                  |
| 132               | M          | 39         | 12.01.17                  |
| 133               | M          | 35         | 12.01.17                  |
| 134               | M          | 36         | 12.01.17                  |
| 135               | F          | 22         | 18.01.17                  |
| 136               | F          | 20         | 18.01.17                  |
| 137               | F          | 21         | 18.01.17                  |
| 138               | F          | 26         | 18.01.17                  |
| 139               | F          | 36         | 18.01.17                  |
| 140               | M          | 23         | 18.01.17                  |
| 141               | M          | 21         | 24.01.17                  |
| 145               | F          | 21         | 24.01.17                  |
| 146               | F          | 21         | 24.01.17                  |
| 147               | F          | 50         | 01.02.17                  |
| 148               | F          | 24         | 01.02.17                  |
| 151               | F          | 49         | 14.02.17                  |
| 176               | F          | 20         | 09.10.17                  |

M, F : male, female
